# Supplementary material for: Salivary proteins associated with hyperglycemia in diabetes: a proteomic analysis
Source: Royal Society of Chemistry journal article supplement (doi:10.1039/c3mb70196d), 2013-09-04
Supplement: c3mb70196d.pdf [file c3mb70196d.pdf]

Supplementary Table 1 Inclusion and Exclusion Criteria

| <b>Inclusion:</b>                                                        | <b>Exclusion:</b>                                                                                                 |
|--------------------------------------------------------------------------|-------------------------------------------------------------------------------------------------------------------|
| Between 18 and 80 years of age.                                          | Less than 18 years or more than 80 years of age.                                                                  |
| Subjects must be willing to follow study procedures and instructions.    | Patients with active oral or systemic inflammation, genetic mutations, cancer or diseases of the salivary glands. |
| Subjects must have read, understood and signed an informed consent form. | Have had a change in medications within the last 120 days                                                         |
|                                                                          | Pregnant women due to problems with a type of diabetes called gestational diabetes.                               |
|                                                                          | Patients who have had something to eat or drink in the last 30 minutes.                                           |
|                                                                          | Patients who have smoked a cigarette or chewed gum in the last 30 minutes.                                        |

Supplementary Table 2 Demographic data of Recruited Subjects

|                    | Diabetes | <7                   |      | 7-8               |      | 8-9                        |     | 9-10             |     | >10                |     | All Subjects                               |      |
|--------------------|----------|----------------------|------|-------------------|------|----------------------------|-----|------------------|-----|--------------------|-----|--------------------------------------------|------|
|                    |          |                      |      |                   |      |                            |     |                  |     |                    |     |                                            |      |
| Number of Subjects | T1       | 16                   |      | 16                |      | 13                         |     | 7                |     | 4                  |     | 5                                          | 1    |
|                    | T2       | 32                   |      | 30                |      | 16                         |     | 7                |     | 12                 |     | 6                                          | 5    |
| A1C Average (SD)   | T1       | 6.4 (±0.4)           |      | 7.4 (±0.3)        |      | 8.3 (±0.3)                 |     | 9.5 (±0.3)       |     | 13 (±1.5)          |     | 8.9                                        | 8.8  |
|                    | T2       | 6.3 (±0.5)           |      | 7.5 (±0.3)        |      | 8.4 (±0.3)                 |     | 9.4 (±0.4)       |     | 12 (±1.4)          |     | 8.7                                        |      |
| Average Age (SD)   | T1       | 44.5 (±16.88)        |      | 48.1 (±11.43)     |      | 51.9 (±18.87)              |     | 39.9 (±18.38)    |     | 30 (±9.06)         |     | 42.9                                       | 49.4 |
|                    | T2       | 58.8 (±10.94)        |      | 60.2 (±11.1)      |      | 60 (±12.5)                 |     | 51.4 (±11.77)    |     | 49.3 (±12.11)      |     | 55.9                                       |      |
| Gender             | T1       | 11 M                 | 5 F  |                   | 7 F  |                            | 8 F | 1 M              | 6 F | 3 M                | 1 F | 29 M                                       | 27 F |
|                    | T2       | 15 M                 | 17 F |                   | 18 F |                            | 9 F | 5 M              | 2 F | 9 M                | 3 F | 48 M                                       | 49 F |
| Race               | T1       | 2 W, 14 AA           |      | 2 AA, 14 W        |      | 4 AA, 1 N/A, 8 W           |     | 2 W, 4 AA, 1 N/A |     | 1 AA, 3 W          |     | 29 W, 37 AA, 2 N/A                         |      |
|                    | T2       | 15 AA, 16 W, 1 other |      | 13 AA, 1 As, 16 W |      | 4 AA, 1 AI/AN, 1 N/A, 10 W |     | 1 W, 1 N/A, 5 AA |     | 5 AA, 1 other, 6 W |     | 49 W, 42 AA, 2 other, 1 As, 1 AI/AN, 2 N/A |      |

|                  |           |      |          |      |     |      |     |     |     |      |          |                |
|------------------|-----------|------|----------|------|-----|------|-----|-----|-----|------|----------|----------------|
| <b>Ethnicity</b> | <b>T1</b> | 16 N | 0 H      | 16 N | 0 H | 13 N | 0 H | 6 N | 1 H | 4 N  | 0 H      | 55 N, 1 H      |
|                  | <b>T2</b> | 30 N | 1 H, 1 U | 30 N | 0 H | 15 N | 1 H | 6 N | 1 H | 10 N | 1 H, 1 U | 91 N, 4 H, 2 U |

Racial Abbreviations: W = Caucasian; AA = African American; As = Asian; AI/AN = American Indian/Alaskan Native; other = multiracial; N/A = did not identify race

Ethnicity Abbreviations: N = Non-hispanic; H = Hispanic, U = unidentified

Gender: M = Male; F = Female

Diabetes; T1 = Type 1 diabetes; T2 = Type 2 diabetes

Age in years

Supplementary Table 3 Sample Summary

|                             |                | T1    |       |       |       |       | T2    |       |       |       |       |
|-----------------------------|----------------|-------|-------|-------|-------|-------|-------|-------|-------|-------|-------|
|                             |                | A1    | B1    | C1    | D1    | E1    | A2    | B2    | C2    | D2    | E2    |
| <b>Age (19-78)</b>          | 41 total       | 4     | 4     | 4     | 4     | 4     | 5     | 4     | 4     | 4     | 4     |
| <b>Gender (41) M:F</b>      | 22M:19F        | 2:2   | 2:2   | 2:2   | 0:4   | 3:1   | 3:2   | 2:2   | 3:1   | 2:2   | 3:1   |
| <b>Race (41) W:AA:other</b> | 9W:16AA:4other | 3:1:0 | 3:1:0 | 3:1:0 | 0:3:1 | 3:1:0 | 3:1:1 | 2:2:0 | 2:1:1 | 0:4:0 | 2:2:0 |
| <b>Ethnicity (41) H:N:U</b> | 3H:37N:1U      | 0:4:0 | 0:4:0 | 0:4:0 | 1:3:0 | 0:4:0 | 0:4:1 | 0:4:0 | 0:4:0 | 0:4:0 | 1:3:0 |

Racial Abbreviations: W = Caucasian; AA = African American; other = multiracial, Asian, American Indian/Alaskan Native, or N/A

Ethnicity Abbreviations: N = Non-hispanic; H = Hispanic, U = unidentified

Gender: M = Male; F = Female

Diabetes; T1 = Type 1 diabetes; T2 = Type 2 diabetes

Age in years
